# Supplementary material
Source: publisher site journal article supplement (https://www.dovepress.com/article/328648)
Supplement: Supplementary file 1 [file get_supplementary_file.php]

## SUPPLEMENTARY MATERIALS

### Statistical Calculations and Analytic Hierarchy Process Pairwise Comparisons

Edsel Ing

#### FLOW CHART SUMMARY OF THE METHODS SECTION

1) The four ICMJE criteria were separated into nine distinct components of authorship

2) Medical editors (n=66) were surveyed to rank the relative importance of the nine authorship components on a Likert-like scale from 0 (no importance) to 10 (most important).

3) The median of each authorship component was used to determine the pairwise comparisons of an Analytic Hierarchy Process (AHP). The AHP priority weight of each component of authorship was calculated.

4) A four-level ordinal effort/ability rating was assigned for each authorship component.

5) An online spreadsheet calculator with advance attestation was used to determine the final sum products of the AHP priority weights and effort/ability ratings.

#### SURVEY RESPONDENTS: DEMOGRAPHICS OF THE EDITORS THAT WERE SURVEYED (World Association of Medical Editors) March-April 2021, n=66

tab gender

| Gender                       | Freq. | Percent | Cum.   |
|------------------------------|-------|---------|--------|
| I identify myself as female. | 13    | 19.70   | 19.70  |
| I identify myself as male.   | 48    | 72.73   | 92.42  |
| Other                        | 1     | 1.52    | 93.94  |
| Prefer not to disclose       | 4     | 6.06    | 100.00 |
| Total                        | 66    | 100.00  |        |

tab age

| Age             | Freq. | Percent | Cum.  |
|-----------------|-------|---------|-------|
| 35-44 years old | 4     | 6.06    | 6.06  |
| 45-54 years old | 11    | 16.67   | 22.73 |

|                   |    |        |        |
|-------------------|----|--------|--------|
| 55-64 years old   | 32 | 48.48  | 71.21  |
| 65-74 years old   | 14 | 21.21  | 92.42  |
| 75 years or older | 5  | 7.58   | 100.00 |
| -----             |    |        |        |
| Total             | 66 | 100.00 |        |

tab countrycode

| CountryCode | Freq. | Percent | Cum.   |
|-------------|-------|---------|--------|
| -----       |       |         |        |
| Asia        | 18    | 27.27   | 27.27  |
| Europe      | 7     | 10.61   | 37.88  |
| NA          | 34    | 51.52   | 89.39  |
| Oceania     | 5     | 7.58    | 96.97  |
| SA          | 2     | 3.03    | 100.00 |
| -----       |       |         |        |
| Total       | 66    | 100.00  |        |

**SUPPLEMENT TO TABLE 1 OF THE MANUSCRIPT. THE RELATIVE IMPORTANCE OF THE ICMJE AUTHORSHIP COMPONENTS AS RATED BY 66 OF THE EDITORS IN THE WORLD ASSOCIATION OF MEDICAL EDITORS IN 2021: MEDIAN, MEAN AND DISTRIBUTION**

| Authorship Component              | Median | Mean (SD) | Min. | Max. | Skewness | Kurtosis |
|-----------------------------------|--------|-----------|------|------|----------|----------|
| Conception                        | 7.5    | 6.9 (2.4) | 2    | 10   | -0.72    | -0.34    |
| Design                            | 8      | 7.0 (2.3) | 2    | 10   | -0.87    | -0.12    |
| Data Acquisition                  | 7      | 6.3 (2.3) | 0    | 10   | -0.67    | -0.05    |
| Data Analysis                     | 7      | 6.6 (2.3) | 1    | 10   | -0.86    | 0.05     |
| Interpretation of Data            | 8      | 7.6 (2.0) | 1    | 10   | -1.25    | 1.77     |
| Draft of Work                     | 8      | 7.0 (2.2) | 2    | 10   | -0.46    | -0.64    |
| Revision for Intellectual Content | 8      | 7.8 (1.9) | 2    | 10   | -1.00    | 0.55     |
| Final Approval                    | 9      | 8.1 (2.5) | 1    | 10   | -1.29    | 0.80     |
| Accountability                    | 10     | 8.4 (2.4) | 1    | 10   | -1.49    | 1.42     |

The rating of importance scale used by Editors in the survey to determine the Median was: 0 = Not at all important; 1 = Extremely unimportant; 2 = Largely unimportant; 3 = Somewhat unimportant; 4 = Slightly unimportant; 5 = Neither important nor Unimportant (Neutral); 6 = Slightly important; 7 = Somewhat important; 8 = Largely important; 9 = Extremely important; 10 = Most important

Min. = minimum  
Max. = maximum

**THE INTER-RATER RELIABILITY OF THE 66 WAME EDITORS WHO COMPLETED THE SURVEY USING KRIPPENDORF'S ALPHA**

```
. krippalpha var2 var3 var4 var5 var6 var7 var8 var9 var10 var11 var12 var13 var14 var15 var16 var17 var18 var19
var20 var21 var22 var23 var24 var25 var26 var27 var28 var29 var30 var31 var32 var33 var34 var35 var36 var37
var38 var39 var40 var41 var42 var43 var44 var45 var46 var47 var48 var49 var50 var51 var52 var53 var54 var55
var56 var57 var58 var59 var60 var61 var62 var63 var64 var65 var66 var67, method (ordinal)
```

-----  
Krippendorff's Alpha reliability coefficient

```
Variable/Coders var2 var3 var4 var5 var6 var7 var8 var9 var10 var11 var12 var13 var14 var15 var16 var17 var18
var19 var20 var21 var22 var23 var24 var25 var26 var27 var28 var29 var30 var31 var32 var33 var34 var35 var36
var37 var38 var39 var40 var41 var42 var43 var44 var45 var46 var47 var48 var49 var50 var51 var52 var53 var54
var55 var56 var57 var58 var59 var60 var61 var62 var63 var64 var65 var66 var67
Method ordinal
Units 9
Raters 66
alpha .09762303
```

**WILCOXON SIGNED RANK TESTS OF THE MEDIAN SCORE OF THE 9 AUTHORSHIP COMPONENTS: WAME Editors, n=66, March-April, 2021 (SPSS)**

| PAIRWISE COMPARISON               | Z       | Asymp. Sig. (2-tailed) | Δ Medians |
|-----------------------------------|---------|------------------------|-----------|
| Design - Conception               | -.423b  | 0.672                  | 0.5       |
| Data_Acquisition - Conception     | -2.880c | 0.004                  | 0.5       |
| Data_Analysis - Conception        | -1.574c | 0.115                  | 0.5       |
| Interpret_Data - Conception       | -1.441b | 0.15                   | 0.5       |
| Draft - Conception                | -.128b  | 0.898                  | 0.5       |
| Revision - Conception             | -2.295b | 0.022                  | 0.5       |
| Final_Approval - Conception       | -2.763b | 0.006                  | 1.5       |
| Accountability - Conception       | -3.807b | <0.001                 | 2.5       |
| Data_Acquisition - Design         | -3.082c | 0.002                  | 1         |
| Data_Analysis - Design            | -1.916c | 0.055                  | 1         |
| Interpret_Data - Design           | -1.705b | 0.088                  | 0         |
| Draft - Design                    | -.125c  | 0.901                  | 0         |
| Revision - Design                 | -2.266b | 0.023                  | 0         |
| Final_Approval - Design           | -2.762b | 0.006                  | 1         |
| Accountability - Design           | -4.059b | <0.001                 | 2         |
| Data_Analysis - Data_Acquisition  | -1.525b | 0.127                  | 0         |
| Interpret_Data - Data_Acquisition | -4.566b | <0.001                 | 1         |
| Draft - Data_Acquisition          | -2.225b | 0.026                  | 1         |
| Revision - Data_Acquisition       | -4.106b | <0.001                 | 1         |
| Final_Approval - Data_Acquisition | -4.165b | <0.001                 | 2         |
| Accountability - Data_Acquisition | -5.071b | <0.001                 | 3         |

|                                 |         |        |   |
|---------------------------------|---------|--------|---|
| Interpret_Data - Data_Analysis  | -3.851b | <0.001 | 1 |
| Draft - Data_Analysis           | -1.227b | 0.22   | 1 |
| Revision - Data_Analysis        | -3.205b | 0.001  | 1 |
| Final_Approval - Data_Analysis  | -3.717b | <0.001 | 2 |
| Accountability - Data_Analysis  | -4.935b | <0.001 | 3 |
| Draft - Interpret_Data          | -2.153c | 0.031  | 0 |
| Revision - Interpret_Data       | -.822b  | 0.411  | 0 |
| Final_Approval - Interpret_Data | -1.860b | 0.063  | 1 |
| Accountability - Interpret_Data | -2.943b | 0.003  | 2 |
| Revision - Draft                | -2.786b | 0.005  | 0 |
| Final_Approval - Draft          | -3.075b | 0.002  | 1 |
| Accountability - Draft          | -4.038b | <0.001 | 2 |
| Final_Approval - Revision       | -1.540b | 0.124  | 1 |
| Accountability - Revision       | -2.461b | 0.014  | 2 |
| Accountability - Final_Approval | -1.264b | 0.206  | 1 |

(Statistically significant p values in red)

b) based on negative ranks

c) based on positive ranks

**THE DIFFERENCES IN THE MEDIAN SCORES OF THE AUTHORSHIP COMPONENTS AND THE COVERSION KEY THAT WAS USED TO CALIBRATE THE PAIRWISE COMPARISONS OF THE ANALYTIC HIERARCHY PROCESS**

| Difference in Median Score of Any Two Authorship Components | AHP Intensity of Importance (Saaty T. , 2008) |
|-------------------------------------------------------------|-----------------------------------------------|
| 0                                                           | 1 (Equal importance)                          |
| 0.5                                                         | 2 (Weak or Slight importance)                 |
| 1                                                           | 3 (Moderate importance)                       |
| 2                                                           | 4 (Moderate “plus” importance)                |
| 3                                                           | 5 (Strong importance)                         |
| 4                                                           | 6 (Strong “Plus” importance)                  |
| 5                                                           | 7 (Very Strong or Demonstrated importance)    |
| 6                                                           | 8 (Very, Very Strong importance)              |
| >= 7                                                        | 9 (Extreme importance)                        |

## THE ACTUAL PAIRWISE COMPARISONS USED FOR THE ANALYTIC HIERARCHY PROCESS

36 pairwise comparison(s). Please do the pairwise comparison of all criteria. When completed, click *Check Consistency* to get the priorities.

**With respect to AHP priorities, which criterion is more important, and how much more on a scale 1 to 9?**

| A - wrt AHP priorities - or B? |                                             | Equal                                                              | How much more?                     |                                    |                                    |                                    |                         |                         |                         |                         |                         |
|--------------------------------|---------------------------------------------|--------------------------------------------------------------------|------------------------------------|------------------------------------|------------------------------------|------------------------------------|-------------------------|-------------------------|-------------------------|-------------------------|-------------------------|
| 1                              | <input type="radio"/> Conception            | <input checked="" type="radio"/> Design                            | <input type="radio"/> 1            | <input checked="" type="radio"/> 2 | <input type="radio"/> 3            | <input type="radio"/> 4            | <input type="radio"/> 5 | <input type="radio"/> 6 | <input type="radio"/> 7 | <input type="radio"/> 8 | <input type="radio"/> 9 |
| 2                              | <input checked="" type="radio"/> Conception | <input type="radio"/> Data Acquisition                             | <input type="radio"/> 1            | <input checked="" type="radio"/> 2 | <input type="radio"/> 3            | <input type="radio"/> 4            | <input type="radio"/> 5 | <input type="radio"/> 6 | <input type="radio"/> 7 | <input type="radio"/> 8 | <input type="radio"/> 9 |
| 3                              | <input checked="" type="radio"/> Conception | <input type="radio"/> Data Analysis                                | <input type="radio"/> 1            | <input checked="" type="radio"/> 2 | <input type="radio"/> 3            | <input type="radio"/> 4            | <input type="radio"/> 5 | <input type="radio"/> 6 | <input type="radio"/> 7 | <input type="radio"/> 8 | <input type="radio"/> 9 |
| 4                              | <input type="radio"/> Conception            | <input checked="" type="radio"/> Interpretation of Data            | <input type="radio"/> 1            | <input checked="" type="radio"/> 2 | <input type="radio"/> 3            | <input type="radio"/> 4            | <input type="radio"/> 5 | <input type="radio"/> 6 | <input type="radio"/> 7 | <input type="radio"/> 8 | <input type="radio"/> 9 |
| 5                              | <input type="radio"/> Conception            | <input checked="" type="radio"/> Drafting the work                 | <input type="radio"/> 1            | <input checked="" type="radio"/> 2 | <input type="radio"/> 3            | <input type="radio"/> 4            | <input type="radio"/> 5 | <input type="radio"/> 6 | <input type="radio"/> 7 | <input type="radio"/> 8 | <input type="radio"/> 9 |
| 6                              | <input type="radio"/> Conception            | <input checked="" type="radio"/> Revising for intellectual content | <input type="radio"/> 1            | <input checked="" type="radio"/> 2 | <input type="radio"/> 3            | <input type="radio"/> 4            | <input type="radio"/> 5 | <input type="radio"/> 6 | <input type="radio"/> 7 | <input type="radio"/> 8 | <input type="radio"/> 9 |
| 7                              | <input type="radio"/> Conception            | <input checked="" type="radio"/> Final approval                    | <input type="radio"/> 1            | <input type="radio"/> 2            | <input checked="" type="radio"/> 3 | <input type="radio"/> 4            | <input type="radio"/> 5 | <input type="radio"/> 6 | <input type="radio"/> 7 | <input type="radio"/> 8 | <input type="radio"/> 9 |
| 8                              | <input type="radio"/> Conception            | <input checked="" type="radio"/> Accountability                    | <input type="radio"/> 1            | <input type="radio"/> 2            | <input type="radio"/> 3            | <input checked="" type="radio"/> 4 | <input type="radio"/> 5 | <input type="radio"/> 6 | <input type="radio"/> 7 | <input type="radio"/> 8 | <input type="radio"/> 9 |
|                                |                                             |                                                                    |                                    |                                    |                                    |                                    |                         |                         |                         |                         |                         |
| 9                              | <input checked="" type="radio"/> Design     | <input type="radio"/> Data Acquisition                             | <input type="radio"/> 1            | <input type="radio"/> 2            | <input checked="" type="radio"/> 3 | <input type="radio"/> 4            | <input type="radio"/> 5 | <input type="radio"/> 6 | <input type="radio"/> 7 | <input type="radio"/> 8 | <input type="radio"/> 9 |
| 10                             | <input checked="" type="radio"/> Design     | <input type="radio"/> Data Analysis                                | <input type="radio"/> 1            | <input type="radio"/> 2            | <input checked="" type="radio"/> 3 | <input type="radio"/> 4            | <input type="radio"/> 5 | <input type="radio"/> 6 | <input type="radio"/> 7 | <input type="radio"/> 8 | <input type="radio"/> 9 |
| 11                             | <input type="radio"/> Design                | <input checked="" type="radio"/> Interpretation of Data            | <input checked="" type="radio"/> 1 | <input type="radio"/> 2            | <input type="radio"/> 3            | <input type="radio"/> 4            | <input type="radio"/> 5 | <input type="radio"/> 6 | <input type="radio"/> 7 | <input type="radio"/> 8 | <input type="radio"/> 9 |
| 12                             | <input type="radio"/> Design                | <input checked="" type="radio"/> Drafting the work                 | <input checked="" type="radio"/> 1 | <input type="radio"/> 2            | <input type="radio"/> 3            | <input type="radio"/> 4            | <input type="radio"/> 5 | <input type="radio"/> 6 | <input type="radio"/> 7 | <input type="radio"/> 8 | <input type="radio"/> 9 |
| 13                             | <input type="radio"/> Design                | <input checked="" type="radio"/> Revising for intellectual content | <input checked="" type="radio"/> 1 | <input type="radio"/> 2            | <input type="radio"/> 3            | <input type="radio"/> 4            | <input type="radio"/> 5 | <input type="radio"/> 6 | <input type="radio"/> 7 | <input type="radio"/> 8 | <input type="radio"/> 9 |
| 14                             | <input type="radio"/> Design                | <input checked="" type="radio"/> Final approval                    | <input type="radio"/> 1            | <input type="radio"/> 2            | <input checked="" type="radio"/> 3 | <input type="radio"/> 4            | <input type="radio"/> 5 | <input type="radio"/> 6 | <input type="radio"/> 7 | <input type="radio"/> 8 | <input type="radio"/> 9 |
| 15                             | <input type="radio"/> Design                | <input checked="" type="radio"/> Accountability                    | <input type="radio"/> 1            | <input type="radio"/> 2            | <input checked="" type="radio"/> 3 | <input type="radio"/> 4            | <input type="radio"/> 5 | <input type="radio"/> 6 | <input type="radio"/> 7 | <input type="radio"/> 8 | <input type="radio"/> 9 |
|                                |                                             |                                                                    |                                    |                                    |                                    |                                    |                         |                         |                         |                         |                         |
| 16                             | <input type="radio"/> Data Acquisition      | <input checked="" type="radio"/> Data Analysis                     | <input checked="" type="radio"/> 1 | <input type="radio"/> 2            | <input type="radio"/> 3            | <input type="radio"/> 4            | <input type="radio"/> 5 | <input type="radio"/> 6 | <input type="radio"/> 7 | <input type="radio"/> 8 | <input type="radio"/> 9 |
| 17                             | <input type="radio"/> Data Acquisition      | <input checked="" type="radio"/> Interpretation of Data            | <input type="radio"/> 1            | <input type="radio"/> 2            | <input checked="" type="radio"/> 3 | <input type="radio"/> 4            | <input type="radio"/> 5 | <input type="radio"/> 6 | <input type="radio"/> 7 | <input type="radio"/> 8 | <input type="radio"/> 9 |
| 18                             | <input type="radio"/> Data Acquisition      | <input checked="" type="radio"/> Drafting the work                 | <input type="radio"/> 1            | <input type="radio"/> 2            | <input checked="" type="radio"/> 3 | <input type="radio"/> 4            | <input type="radio"/> 5 | <input type="radio"/> 6 | <input type="radio"/> 7 | <input type="radio"/> 8 | <input type="radio"/> 9 |
| 19                             | <input type="radio"/> Data Acquisition      | <input checked="" type="radio"/> Revising for intellectual content | <input type="radio"/> 1            | <input type="radio"/> 2            | <input checked="" type="radio"/> 3 | <input type="radio"/> 4            | <input type="radio"/> 5 | <input type="radio"/> 6 | <input type="radio"/> 7 | <input type="radio"/> 8 | <input type="radio"/> 9 |
| 20                             | <input type="radio"/> Data Acquisition      | <input checked="" type="radio"/> Final approval                    | <input type="radio"/> 1            | <input type="radio"/> 2            | <input type="radio"/> 3            | <input checked="" type="radio"/> 4 | <input type="radio"/> 5 | <input type="radio"/> 6 | <input type="radio"/> 7 | <input type="radio"/> 8 | <input type="radio"/> 9 |
| 21                             | <input type="radio"/> Data Acquisition      | <input checked="" type="radio"/> Accountability                    | <input type="radio"/> 1            | <input type="radio"/> 2            | <input type="radio"/> 3            | <input checked="" type="radio"/> 4 | <input type="radio"/> 5 | <input type="radio"/> 6 | <input type="radio"/> 7 | <input type="radio"/> 8 | <input type="radio"/> 9 |
|                                |                                             |                                                                    |                                    |                                    |                                    |                                    |                         |                         |                         |                         |                         |
| 22                             | <input type="radio"/> Data Analysis         | <input checked="" type="radio"/> Interpretation of Data            | <input type="radio"/> 1            | <input type="radio"/> 2            | <input checked="" type="radio"/> 3 | <input type="radio"/> 4            | <input type="radio"/> 5 | <input type="radio"/> 6 | <input type="radio"/> 7 | <input type="radio"/> 8 | <input type="radio"/> 9 |

| A - wrt AHP priorities - or B?           |                                                         | Equal                                                              | How much more?                                                                     |                         |                                    |                                    |                                    |                         |                         |                         |                         |
|------------------------------------------|---------------------------------------------------------|--------------------------------------------------------------------|------------------------------------------------------------------------------------|-------------------------|------------------------------------|------------------------------------|------------------------------------|-------------------------|-------------------------|-------------------------|-------------------------|
| 23                                       | <input type="radio"/> Data Analysis                     | <input checked="" type="radio"/> Drafting the work                 | <input type="radio"/> 1                                                            | <input type="radio"/> 2 | <input checked="" type="radio"/> 3 | <input type="radio"/> 4            | <input type="radio"/> 5            | <input type="radio"/> 6 | <input type="radio"/> 7 | <input type="radio"/> 8 | <input type="radio"/> 9 |
| 24                                       | <input type="radio"/> Data Analysis                     | <input checked="" type="radio"/> Revising for intellectual content | <input type="radio"/> 1                                                            | <input type="radio"/> 2 | <input checked="" type="radio"/> 3 | <input type="radio"/> 4            | <input type="radio"/> 5            | <input type="radio"/> 6 | <input type="radio"/> 7 | <input type="radio"/> 8 | <input type="radio"/> 9 |
| 25                                       | <input type="radio"/> Data Analysis                     | <input checked="" type="radio"/> Final approval                    | <input type="radio"/> 1                                                            | <input type="radio"/> 2 | <input type="radio"/> 3            | <input checked="" type="radio"/> 4 | <input type="radio"/> 5            | <input type="radio"/> 6 | <input type="radio"/> 7 | <input type="radio"/> 8 | <input type="radio"/> 9 |
| 26                                       | <input type="radio"/> Data Analysis                     | <input checked="" type="radio"/> Accountability                    | <input type="radio"/> 1                                                            | <input type="radio"/> 2 | <input type="radio"/> 3            | <input type="radio"/> 4            | <input checked="" type="radio"/> 5 | <input type="radio"/> 6 | <input type="radio"/> 7 | <input type="radio"/> 8 | <input type="radio"/> 9 |
| 27                                       | <input checked="" type="radio"/> Interpretation of Data | <input type="radio"/> Drafting the work                            | <input checked="" type="radio"/> 1                                                 | <input type="radio"/> 2 | <input type="radio"/> 3            | <input type="radio"/> 4            | <input type="radio"/> 5            | <input type="radio"/> 6 | <input type="radio"/> 7 | <input type="radio"/> 8 | <input type="radio"/> 9 |
| 28                                       | <input type="radio"/> Interpretation of Data            | <input checked="" type="radio"/> Revising for intellectual content | <input checked="" type="radio"/> 1                                                 | <input type="radio"/> 2 | <input type="radio"/> 3            | <input type="radio"/> 4            | <input type="radio"/> 5            | <input type="radio"/> 6 | <input type="radio"/> 7 | <input type="radio"/> 8 | <input type="radio"/> 9 |
| 29                                       | <input type="radio"/> Interpretation of Data            | <input checked="" type="radio"/> Final approval                    | <input type="radio"/> 1                                                            | <input type="radio"/> 2 | <input checked="" type="radio"/> 3 | <input type="radio"/> 4            | <input type="radio"/> 5            | <input type="radio"/> 6 | <input type="radio"/> 7 | <input type="radio"/> 8 | <input type="radio"/> 9 |
| 30                                       | <input type="radio"/> Interpretation of Data            | <input checked="" type="radio"/> Accountability                    | <input type="radio"/> 1                                                            | <input type="radio"/> 2 | <input type="radio"/> 3            | <input checked="" type="radio"/> 4 | <input type="radio"/> 5            | <input type="radio"/> 6 | <input type="radio"/> 7 | <input type="radio"/> 8 | <input type="radio"/> 9 |
| 31                                       | <input type="radio"/> Drafting the work                 | <input checked="" type="radio"/> Revising for intellectual content | <input checked="" type="radio"/> 1                                                 | <input type="radio"/> 2 | <input type="radio"/> 3            | <input type="radio"/> 4            | <input type="radio"/> 5            | <input type="radio"/> 6 | <input type="radio"/> 7 | <input type="radio"/> 8 | <input type="radio"/> 9 |
| 32                                       | <input type="radio"/> Drafting the work                 | <input checked="" type="radio"/> Final approval                    | <input type="radio"/> 1                                                            | <input type="radio"/> 2 | <input checked="" type="radio"/> 3 | <input type="radio"/> 4            | <input type="radio"/> 5            | <input type="radio"/> 6 | <input type="radio"/> 7 | <input type="radio"/> 8 | <input type="radio"/> 9 |
| 33                                       | <input type="radio"/> Drafting the work                 | <input checked="" type="radio"/> Accountability                    | <input type="radio"/> 1                                                            | <input type="radio"/> 2 | <input type="radio"/> 3            | <input checked="" type="radio"/> 4 | <input type="radio"/> 5            | <input type="radio"/> 6 | <input type="radio"/> 7 | <input type="radio"/> 8 | <input type="radio"/> 9 |
| 34                                       | <input type="radio"/> Revising for intellectual content | <input checked="" type="radio"/> Final approval                    | <input type="radio"/> 1                                                            | <input type="radio"/> 2 | <input checked="" type="radio"/> 3 | <input type="radio"/> 4            | <input type="radio"/> 5            | <input type="radio"/> 6 | <input type="radio"/> 7 | <input type="radio"/> 8 | <input type="radio"/> 9 |
| 35                                       | <input type="radio"/> Revising for intellectual content | <input checked="" type="radio"/> Accountability                    | <input type="radio"/> 1                                                            | <input type="radio"/> 2 | <input type="radio"/> 3            | <input checked="" type="radio"/> 4 | <input type="radio"/> 5            | <input type="radio"/> 6 | <input type="radio"/> 7 | <input type="radio"/> 8 | <input type="radio"/> 9 |
| 36                                       | <input type="radio"/> Final approval                    | <input checked="" type="radio"/> Accountability                    | <input type="radio"/> 1                                                            | <input type="radio"/> 2 | <input checked="" type="radio"/> 3 | <input type="radio"/> 4            | <input type="radio"/> 5            | <input type="radio"/> 6 | <input type="radio"/> 7 | <input type="radio"/> 8 | <input type="radio"/> 9 |
| CR = 2.2% OK                             |                                                         |                                                                    |                                                                                    |                         |                                    |                                    |                                    |                         |                         |                         |                         |
| <input type="button" value="Calculate"/> |                                                         |                                                                    | <input type="button" value="Download_(.csv)"/> <input type="checkbox"/> dec. comma |                         |                                    |                                    |                                    |                         |                         |                         |                         |

AHP Scale: 1- Equal Importance, 3- Moderate importance, 5- Strong importance, 7- Very strong importance, 9- Extreme importance (2,4,6,8 values in-between).

With respect to AHP priorities, which criterion is more important, and how much more on a scale 1 to 9?

| A - wrt AHP priorities - or B? |                                                                                                                 | Equal                              | How much more?                                                                                                                                                                                             |
|--------------------------------|-----------------------------------------------------------------------------------------------------------------|------------------------------------|------------------------------------------------------------------------------------------------------------------------------------------------------------------------------------------------------------|
| 1                              | <input type="radio"/> Conception <input checked="" type="radio"/> Design                                        | <input type="radio"/> 1            | <input checked="" type="radio"/> 2 <input type="radio"/> 3 <input type="radio"/> 4 <input type="radio"/> 5 <input type="radio"/> 6 <input type="radio"/> 7 <input type="radio"/> 8 <input type="radio"/> 9 |
| 2                              | <input checked="" type="radio"/> Conception <input type="radio"/> Data Acquisition                              | <input type="radio"/> 1            | <input checked="" type="radio"/> 2 <input type="radio"/> 3 <input type="radio"/> 4 <input type="radio"/> 5 <input type="radio"/> 6 <input type="radio"/> 7 <input type="radio"/> 8 <input type="radio"/> 9 |
| 3                              | <input checked="" type="radio"/> Conception <input type="radio"/> Data Analysis                                 | <input type="radio"/> 1            | <input checked="" type="radio"/> 2 <input type="radio"/> 3 <input type="radio"/> 4 <input type="radio"/> 5 <input type="radio"/> 6 <input type="radio"/> 7 <input type="radio"/> 8 <input type="radio"/> 9 |
| 4                              | <input type="radio"/> Conception <input checked="" type="radio"/> Interpretation of Data                        | <input type="radio"/> 1            | <input checked="" type="radio"/> 2 <input type="radio"/> 3 <input type="radio"/> 4 <input type="radio"/> 5 <input type="radio"/> 6 <input type="radio"/> 7 <input type="radio"/> 8 <input type="radio"/> 9 |
| 5                              | <input type="radio"/> Conception <input checked="" type="radio"/> Drafting the work                             | <input type="radio"/> 1            | <input checked="" type="radio"/> 2 <input type="radio"/> 3 <input type="radio"/> 4 <input type="radio"/> 5 <input type="radio"/> 6 <input type="radio"/> 7 <input type="radio"/> 8 <input type="radio"/> 9 |
| 6                              | <input type="radio"/> Conception <input checked="" type="radio"/> Revising for intellectual content             | <input type="radio"/> 1            | <input checked="" type="radio"/> 2 <input type="radio"/> 3 <input type="radio"/> 4 <input type="radio"/> 5 <input type="radio"/> 6 <input type="radio"/> 7 <input type="radio"/> 8 <input type="radio"/> 9 |
| 7                              | <input type="radio"/> Conception <input checked="" type="radio"/> Final approval                                | <input type="radio"/> 1            | <input type="radio"/> 2 <input type="radio"/> 3 <input checked="" type="radio"/> 4 <input type="radio"/> 5 <input type="radio"/> 6 <input type="radio"/> 7 <input type="radio"/> 8 <input type="radio"/> 9 |
| 8                              | <input type="radio"/> Conception <input checked="" type="radio"/> Accountability                                | <input type="radio"/> 1            | <input type="radio"/> 2 <input type="radio"/> 3 <input type="radio"/> 4 <input checked="" type="radio"/> 5 <input type="radio"/> 6 <input type="radio"/> 7 <input type="radio"/> 8 <input type="radio"/> 9 |
| 9                              | <input checked="" type="radio"/> Design <input type="radio"/> Data Acquisition                                  | <input type="radio"/> 1            | <input type="radio"/> 2 <input checked="" type="radio"/> 3 <input type="radio"/> 4 <input type="radio"/> 5 <input type="radio"/> 6 <input type="radio"/> 7 <input type="radio"/> 8 <input type="radio"/> 9 |
| 10                             | <input checked="" type="radio"/> Design <input type="radio"/> Data Analysis                                     | <input type="radio"/> 1            | <input type="radio"/> 2 <input checked="" type="radio"/> 3 <input type="radio"/> 4 <input type="radio"/> 5 <input type="radio"/> 6 <input type="radio"/> 7 <input type="radio"/> 8 <input type="radio"/> 9 |
| 11                             | <input type="radio"/> Design <input checked="" type="radio"/> Interpretation of Data                            | <input checked="" type="radio"/> 1 | <input type="radio"/> 2 <input type="radio"/> 3 <input type="radio"/> 4 <input type="radio"/> 5 <input type="radio"/> 6 <input type="radio"/> 7 <input type="radio"/> 8 <input type="radio"/> 9            |
| 12                             | <input type="radio"/> Design <input checked="" type="radio"/> Drafting the work                                 | <input checked="" type="radio"/> 1 | <input type="radio"/> 2 <input type="radio"/> 3 <input type="radio"/> 4 <input type="radio"/> 5 <input type="radio"/> 6 <input type="radio"/> 7 <input type="radio"/> 8 <input type="radio"/> 9            |
| 13                             | <input type="radio"/> Design <input checked="" type="radio"/> Revising for intellectual content                 | <input checked="" type="radio"/> 1 | <input type="radio"/> 2 <input type="radio"/> 3 <input type="radio"/> 4 <input type="radio"/> 5 <input type="radio"/> 6 <input type="radio"/> 7 <input type="radio"/> 8 <input type="radio"/> 9            |
| 14                             | <input type="radio"/> Design <input checked="" type="radio"/> Final approval                                    | <input type="radio"/> 1            | <input type="radio"/> 2 <input checked="" type="radio"/> 3 <input type="radio"/> 4 <input type="radio"/> 5 <input type="radio"/> 6 <input type="radio"/> 7 <input type="radio"/> 8 <input type="radio"/> 9 |
| 15                             | <input type="radio"/> Design <input checked="" type="radio"/> Accountability                                    | <input type="radio"/> 1            | <input type="radio"/> 2 <input type="radio"/> 3 <input checked="" type="radio"/> 4 <input type="radio"/> 5 <input type="radio"/> 6 <input type="radio"/> 7 <input type="radio"/> 8 <input type="radio"/> 9 |
| 16                             | <input type="radio"/> Data Acquisition <input checked="" type="radio"/> Data Analysis                           | <input checked="" type="radio"/> 1 | <input type="radio"/> 2 <input type="radio"/> 3 <input type="radio"/> 4 <input type="radio"/> 5 <input type="radio"/> 6 <input type="radio"/> 7 <input type="radio"/> 8 <input type="radio"/> 9            |
| 17                             | <input type="radio"/> Data Acquisition <input checked="" type="radio"/> Interpretation of Data                  | <input type="radio"/> 1            | <input type="radio"/> 2 <input checked="" type="radio"/> 3 <input type="radio"/> 4 <input type="radio"/> 5 <input type="radio"/> 6 <input type="radio"/> 7 <input type="radio"/> 8 <input type="radio"/> 9 |
| 18                             | <input type="radio"/> Data Acquisition <input checked="" type="radio"/> Drafting the work                       | <input type="radio"/> 1            | <input type="radio"/> 2 <input checked="" type="radio"/> 3 <input type="radio"/> 4 <input type="radio"/> 5 <input type="radio"/> 6 <input type="radio"/> 7 <input type="radio"/> 8 <input type="radio"/> 9 |
| 19                             | <input type="radio"/> Data Acquisition <input checked="" type="radio"/> Revising for intellectual content       | <input type="radio"/> 1            | <input type="radio"/> 2 <input checked="" type="radio"/> 3 <input type="radio"/> 4 <input type="radio"/> 5 <input type="radio"/> 6 <input type="radio"/> 7 <input type="radio"/> 8 <input type="radio"/> 9 |
| 20                             | <input type="radio"/> Data Acquisition <input checked="" type="radio"/> Final approval                          | <input type="radio"/> 1            | <input type="radio"/> 2 <input type="radio"/> 3 <input checked="" type="radio"/> 4 <input type="radio"/> 5 <input type="radio"/> 6 <input type="radio"/> 7 <input type="radio"/> 8 <input type="radio"/> 9 |
| 21                             | <input type="radio"/> Data Acquisition <input checked="" type="radio"/> Accountability                          | <input type="radio"/> 1            | <input type="radio"/> 2 <input type="radio"/> 3 <input type="radio"/> 4 <input checked="" type="radio"/> 5 <input type="radio"/> 6 <input type="radio"/> 7 <input type="radio"/> 8 <input type="radio"/> 9 |
| 22                             | <input type="radio"/> Data Analysis <input checked="" type="radio"/> Interpretation of Data                     | <input type="radio"/> 1            | <input type="radio"/> 2 <input checked="" type="radio"/> 3 <input type="radio"/> 4 <input type="radio"/> 5 <input type="radio"/> 6 <input type="radio"/> 7 <input type="radio"/> 8 <input type="radio"/> 9 |
| 23                             | <input type="radio"/> Data Analysis <input checked="" type="radio"/> Drafting the work                          | <input type="radio"/> 1            | <input type="radio"/> 2 <input checked="" type="radio"/> 3 <input type="radio"/> 4 <input type="radio"/> 5 <input type="radio"/> 6 <input type="radio"/> 7 <input type="radio"/> 8 <input type="radio"/> 9 |
| 24                             | <input type="radio"/> Data Analysis <input checked="" type="radio"/> Revising for intellectual content          | <input type="radio"/> 1            | <input type="radio"/> 2 <input checked="" type="radio"/> 3 <input type="radio"/> 4 <input type="radio"/> 5 <input type="radio"/> 6 <input type="radio"/> 7 <input type="radio"/> 8 <input type="radio"/> 9 |
| 25                             | <input type="radio"/> Data Analysis <input checked="" type="radio"/> Final approval                             | <input type="radio"/> 1            | <input type="radio"/> 2 <input type="radio"/> 3 <input checked="" type="radio"/> 4 <input type="radio"/> 5 <input type="radio"/> 6 <input type="radio"/> 7 <input type="radio"/> 8 <input type="radio"/> 9 |
| 26                             | <input type="radio"/> Data Analysis <input checked="" type="radio"/> Accountability                             | <input type="radio"/> 1            | <input type="radio"/> 2 <input type="radio"/> 3 <input type="radio"/> 4 <input checked="" type="radio"/> 5 <input type="radio"/> 6 <input type="radio"/> 7 <input type="radio"/> 8 <input type="radio"/> 9 |
| 27                             | <input checked="" type="radio"/> Interpretation of Data <input type="radio"/> Drafting the work                 | <input checked="" type="radio"/> 1 | <input type="radio"/> 2 <input type="radio"/> 3 <input type="radio"/> 4 <input type="radio"/> 5 <input type="radio"/> 6 <input type="radio"/> 7 <input type="radio"/> 8 <input type="radio"/> 9            |
| 28                             | <input type="radio"/> Interpretation of Data <input checked="" type="radio"/> Revising for intellectual content | <input checked="" type="radio"/> 1 | <input type="radio"/> 2 <input type="radio"/> 3 <input type="radio"/> 4 <input type="radio"/> 5 <input type="radio"/> 6 <input type="radio"/> 7 <input type="radio"/> 8 <input type="radio"/> 9            |
| 29                             | <input type="radio"/> Interpretation of Data <input checked="" type="radio"/> Final approval                    | <input type="radio"/> 1            | <input type="radio"/> 2 <input checked="" type="radio"/> 3 <input type="radio"/> 4 <input type="radio"/> 5 <input type="radio"/> 6 <input type="radio"/> 7 <input type="radio"/> 8 <input type="radio"/> 9 |
| 30                             | <input type="radio"/> Interpretation of Data <input checked="" type="radio"/> Accountability                    | <input type="radio"/> 1            | <input type="radio"/> 2 <input type="radio"/> 3 <input checked="" type="radio"/> 4 <input type="radio"/> 5 <input type="radio"/> 6 <input type="radio"/> 7 <input type="radio"/> 8 <input type="radio"/> 9 |
| 31                             | <input type="radio"/> Drafting the work <input checked="" type="radio"/> Revising for intellectual content      | <input checked="" type="radio"/> 1 | <input type="radio"/> 2 <input type="radio"/> 3 <input type="radio"/> 4 <input type="radio"/> 5 <input type="radio"/> 6 <input type="radio"/> 7 <input type="radio"/> 8 <input type="radio"/> 9            |
| 32                             | <input type="radio"/> Drafting the work <input checked="" type="radio"/> Final approval                         | <input type="radio"/> 1            | <input type="radio"/> 2 <input checked="" type="radio"/> 3 <input type="radio"/> 4 <input type="radio"/> 5 <input type="radio"/> 6 <input type="radio"/> 7 <input type="radio"/> 8 <input type="radio"/> 9 |
| 33                             | <input type="radio"/> Drafting the work <input checked="" type="radio"/> Accountability                         | <input type="radio"/> 1            | <input type="radio"/> 2 <input type="radio"/> 3 <input checked="" type="radio"/> 4 <input type="radio"/> 5 <input type="radio"/> 6 <input type="radio"/> 7 <input type="radio"/> 8 <input type="radio"/> 9 |
| 34                             | <input type="radio"/> Revising for intellectual content <input checked="" type="radio"/> Final approval         | <input type="radio"/> 1            | <input type="radio"/> 2 <input checked="" type="radio"/> 3 <input type="radio"/> 4 <input type="radio"/> 5 <input type="radio"/> 6 <input type="radio"/> 7 <input type="radio"/> 8 <input type="radio"/> 9 |
| 35                             | <input type="radio"/> Revising for intellectual content <input checked="" type="radio"/> Accountability         | <input type="radio"/> 1            | <input type="radio"/> 2 <input type="radio"/> 3 <input checked="" type="radio"/> 4 <input type="radio"/> 5 <input type="radio"/> 6 <input type="radio"/> 7 <input type="radio"/> 8 <input type="radio"/> 9 |
| 36                             | <input type="radio"/> Final approval <input checked="" type="radio"/> Accountability                            | <input type="radio"/> 1            | <input type="radio"/> 2 <input checked="" type="radio"/> 3 <input type="radio"/> 4 <input type="radio"/> 5 <input type="radio"/> 6 <input type="radio"/> 7 <input type="radio"/> 8 <input type="radio"/> 9 |
| CR = 2.2% OK                   |                                                                                                                 |                                    |                                                                                                                                                                                                            |

## Resulting Priorities

### Priorities

These are the resulting weights for the criteria based on your pairwise comparisons:

| Cat |                                   | Priority | Rank | (+)   | (-)   |
|-----|-----------------------------------|----------|------|-------|-------|
| 1   | Conception                        | 5.3%     | 7    | 1.1%  | 1.1%  |
| 2   | Design                            | 8.9%     | 3    | 1.3%  | 1.3%  |
| 3   | Data Acquisition                  | 3.6%     | 8    | 1.2%  | 1.2%  |
| 4   | Data Analysis                     | 3.6%     | 8    | 1.2%  | 1.2%  |
| 5   | Interpretation of Data            | 8.9%     | 3    | 1.3%  | 1.3%  |
| 6   | Drafting the work                 | 8.9%     | 3    | 1.3%  | 1.3%  |
| 7   | Revising for intellectual content | 8.9%     | 3    | 1.3%  | 1.3%  |
| 8   | Final approval                    | 20.2%    | 2    | 6.2%  | 6.2%  |
| 9   | Accountability                    | 32.0%    | 1    | 12.3% | 12.3% |

Number of comparisons = 36  
**Consistency Ratio CR = 2.2%**

### Decision Matrix

The resulting weights are based on the principal eigenvector the decision matrix:

|   | 1    | 2    | 3    | 4    | 5    | 6    | 7    | 8    | 9    |
|---|------|------|------|------|------|------|------|------|------|
| 1 | 1    | 0.50 | 2.00 | 2.00 | 0.50 | 0.50 | 0.50 | 0.25 | 0.20 |
| 2 | 2.00 | 1    | 3.00 | 3.00 | 1.00 | 1.00 | 1.00 | 0.33 | 0.25 |
| 3 | 0.50 | 0.33 | 1    | 1.00 | 0.33 | 0.33 | 0.33 | 0.25 | 0.20 |
| 4 | 0.50 | 0.33 | 1.00 | 1    | 0.33 | 0.33 | 0.33 | 0.25 | 0.20 |
| 5 | 2.00 | 1.00 | 3.00 | 3.00 | 1    | 1.00 | 1.00 | 0.33 | 0.25 |
| 6 | 2.00 | 1.00 | 3.00 | 3.00 | 1.00 | 1    | 1.00 | 0.33 | 0.25 |
| 7 | 2.00 | 1.00 | 3.00 | 3.00 | 1.00 | 1.00 | 1    | 0.33 | 0.25 |
| 8 | 4.00 | 3.00 | 4.00 | 4.00 | 3.00 | 3.00 | 3.00 | 1    | 0.33 |
| 9 | 5.00 | 4.00 | 5.00 | 5.00 | 4.00 | 4.00 | 4.00 | 3.00 | 1    |

Principal eigen value = 9.260  
 Eigenvector solution: 5 iterations, delta = 1.8E-8

**\*\* In the paper “Final Approval” was decreased by 0.01% to 20.1% and “Accountability” was decreased by 0.02% to 31.8% compared to the above AHP calculator output, in order to round the total contribution to 100%.**



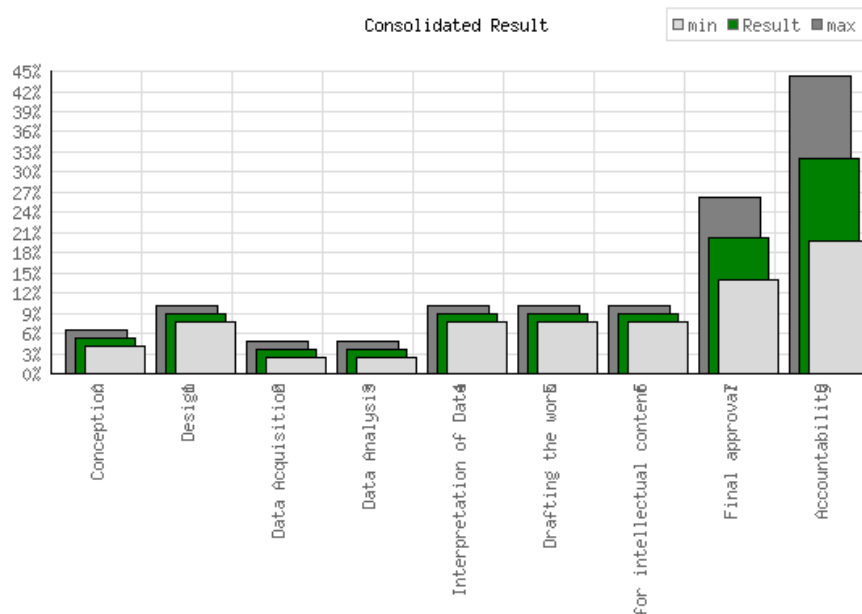

**THE PROPOSED EFFORT/CAPABILITY LEVELS FOR EACH AUTHORSHIP COMPONENT**

| Authorship Component   | Effort / Capability level                                           |                                                                 |                                                                   |                                                                                    |
|------------------------|---------------------------------------------------------------------|-----------------------------------------------------------------|-------------------------------------------------------------------|------------------------------------------------------------------------------------|
|                        | No Score (0/3)                                                      | Low Score (1/3)                                                 | Medium Score (2/3)                                                | High Score (3/3)                                                                   |
| Conception             | No contribution                                                     | Supporter of idea(s)                                            | Collaborator on idea(s)                                           | Originator of idea(s)                                                              |
| Design                 | No contribution                                                     | < 1 hour                                                        | 1 to 8 hours                                                      | > 8 hours                                                                          |
| Data Acquisition       | No contribution                                                     | < 8 hours                                                       | 8-24 hours                                                        | > 24 hours                                                                         |
| Data Analysis          | No contribution                                                     | < 1 hour                                                        | 1 to 8 hours                                                      | > 8 hours                                                                          |
| Interpretation of Data | No contribution                                                     | < 1 hour                                                        | 1 to 4 hours                                                      | > 4 hours                                                                          |
| Draft of Manuscript    | No contribution                                                     | < 4 hours                                                       | 4-24 hours                                                        | > 24 hours                                                                         |
| Revision of Manuscript | No contribution                                                     | < 1 hour                                                        | 1 to 8 hours                                                      | > 8 hours                                                                          |
| Final approval**       | No contribution                                                     | < 1 hour                                                        | 1 to 2 hours                                                      | > 2 hours                                                                          |
| Accountability         | Unable to respond to any of the questions or details about the work | Can respond to <50% of the questions and details about the work | Can respond to 50-80% of the questions and details about the work | Guarantor* of article, able to respond to all questions and details about the work |

**GEOGRAPHIC ANALYSIS of the Survey Scores from North American Editors versus Editors from Other Continents**

```
. kwallis conception, by(countrydiv)
```

Kruskal-Wallis equality-of-populations rank test

```

+-----+
| countr~v | Obs | Rank Sum |
+-----+-----+-----+
|          0 | 32 | 1103.00 |
|          1 | 34 | 1108.00 |
+-----+-----+-----+

```

chi-squared = 0.158 with 1 d.f.  
probability = 0.6908

chi-squared with ties = 0.162 with 1 d.f.  
probability = 0.6875

. kwallis design , by(countrydiv)

Kruskal-Wallis equality-of-populations rank test

| countrydiv | Obs | Rank Sum |
|------------|-----|----------|
| 0          | 32  | 1069.00  |
| 1          | 34  | 1142.00  |

chi-squared = 0.001 with 1 d.f.  
probability = 0.9693

chi-squared with ties = 0.002 with 1 d.f.  
probability = 0.9686

. kwallis data\_acquisition, by(countrydiv)

Kruskal-Wallis equality-of-populations rank test

| countrydiv | Obs | Rank Sum |
|------------|-----|----------|
| 0          | 32  | 1042.00  |
| 1          | 34  | 1169.00  |

chi-squared = 0.148 with 1 d.f.  
probability = 0.7003

chi-squared with ties = 0.152 with 1 d.f.  
probability = 0.6964

. kwallis data\_analysis , by(countrydiv)

Kruskal-Wallis equality-of-populations rank test

| countrydiv | Obs | Rank Sum |
|------------|-----|----------|
| 0          | 32  | 1064.00  |
| 1          | 34  | 1147.00  |

chi-squared = 0.011 with 1 d.f.  
probability = 0.9182

chi-squared with ties = 0.011 with 1 d.f.  
probability = 0.9168

. kwallis interpret\_data , by(countrydiv)

Kruskal-Wallis equality-of-populations rank test

| countrydiv | Obs | Rank Sum |
|------------|-----|----------|
| 0          | 32  | 1039.00  |
| 1          | 34  | 1172.00  |

chi-squared = 0.179 with 1 d.f.  
probability = 0.6720

chi-squared with ties = 0.187 with 1 d.f.  
probability = 0.6655

. kwallis draft , by(countrydiv)

Kruskal-Wallis equality-of-populations rank test

```

+-----+
| countr~v | Obs | Rank Sum |
+-----+-----+-----+
|          0 | 32 | 1066.00 |
|          1 | 34 | 1145.00 |
+-----+

```

chi-squared = 0.006 with 1 d.f.  
probability = 0.9386

chi-squared with ties = 0.006 with 1 d.f.  
probability = 0.9376

. kwallis revision , by(countrydiv)

Kruskal-Wallis equality-of-populations rank test

```

+-----+
| countr~v | Obs | Rank Sum |
+-----+-----+-----+
|          0 | 32 | 1178.00 |
|          1 | 34 | 1033.00 |
+-----+

```

chi-squared = 1.850 with 1 d.f.  
probability = 0.1738

chi-squared with ties = 1.942 with 1 d.f.  
probability = 0.1635

. kwallis final\_approval , by(countrydiv)

Kruskal-Wallis equality-of-populations rank test

```

+-----+
| countr~v | Obs | Rank Sum |
+-----+-----+-----+
|          0 | 32 | 1216.50 |
|          1 | 34 | 994.50 |
+-----+

```

chi-squared = 3.437 with 1 d.f.  
probability = 0.0637

chi-squared with ties = 3.852 with 1 d.f.  
probability = 0.0497

Given the extensive repeated multiple testing, with a Bonferroni correction the p value should be at most .05/9 = 0.0056 if not lower.

. kwallis accountability , by(countrydiv)

Kruskal-Wallis equality-of-populations rank test

```

+-----+
| countr~v | Obs | Rank Sum |
+-----+-----+-----+
|          0 | 32 | 1033.50 |
|          1 | 34 | 1177.50 |
+-----+

```

chi-squared = 0.244 with 1 d.f.  
probability = 0.6213

chi-squared with ties = 0.288 with 1 d.f.  
probability = 0.5915

## GEOGRAPHIC ANALYSIS of Survey Scores from Editors in (North America + Oceania) versus Other Continents

. replace countrydiv =1 if countrycode =="Oceania"  
(5 real changes made)

. kwallis conception, by(countrydiv)

Kruskal-Wallis equality-of-populations rank test

```

+-----+
| countr~v | Obs | Rank Sum |
+-----+-----+
|          0 | 27 |    876.50 |
|          1 | 39 |   1334.50 |
+-----+-----+

```

chi-squared = 0.133 with 1 d.f.  
probability = 0.7150

chi-squared with ties = 0.136 with 1 d.f.  
probability = 0.7119

. kwallis design , by(countrydiv)

Kruskal-Wallis equality-of-populations rank test

```

+-----+
| countr~v | Obs | Rank Sum |
+-----+-----+
|          0 | 27 |    832.00 |
|          1 | 39 |   1379.00 |
+-----+-----+

```

chi-squared = 0.894 with 1 d.f.  
probability = 0.3444

chi-squared with ties = 0.931 with 1 d.f.  
probability = 0.3345

. kwallis data\_acquisition, by(countrydiv)

Kruskal-Wallis equality-of-populations rank test

```

+-----+
| countr~v | Obs | Rank Sum |
+-----+-----+
|          0 | 27 |    797.50 |
|          1 | 39 |   1413.50 |
+-----+-----+

```

chi-squared = 1.947 with 1 d.f.  
probability = 0.1629

chi-squared with ties = 2.002 with 1 d.f.  
probability = 0.1571

. kwallis data\_analysis , by(countrydiv)

Kruskal-Wallis equality-of-populations rank test

```

+-----+
| countr~v | Obs | Rank Sum |
+-----+-----+
|          0 | 27 |    834.00 |
|          1 | 39 |   1377.00 |
+-----+-----+

```

chi-squared = 0.845 with 1 d.f.  
probability = 0.3579

chi-squared with ties = 0.875 with 1 d.f.  
probability = 0.3497

. kwallis interpret\_data , by(countrydiv)

Kruskal-Wallis equality-of-populations rank test

```

+-----+
| countr~v | Obs | Rank Sum |
+-----+-----+
|          0 | 27 |    822.00 |
|          1 | 39 |   1389.00 |
+-----+-----+

```

chi-squared = 1.158 with 1 d.f.  
probability = 0.2819

chi-squared with ties = 1.207 with 1 d.f.

probability = 0.2720

. kwallis draft , by(countrydiv)

Kruskal-Wallis equality-of-populations rank test

| countrydiv | Obs | Rank Sum |
|------------|-----|----------|
| 0          | 27  | 853.00   |
| 1          | 39  | 1358.00  |

chi-squared = 0.451 with 1 d.f.

probability = 0.5018

chi-squared with ties = 0.465 with 1 d.f.

probability = 0.4952

. kwallis revision , by(countrydiv)

Kruskal-Wallis equality-of-populations rank test

| countrydiv | Obs | Rank Sum |
|------------|-----|----------|
| 0          | 27  | 935.50   |
| 1          | 39  | 1275.50  |

chi-squared = 0.163 with 1 d.f.

probability = 0.6860

chi-squared with ties = 0.172 with 1 d.f.

probability = 0.6787

. kwallis final\_approval , by(countrydiv)

Kruskal-Wallis equality-of-populations rank test

| countrydiv | Obs | Rank Sum |
|------------|-----|----------|
| 0          | 27  | 1000.50  |
| 1          | 39  | 1210.50  |

chi-squared = 1.568 with 1 d.f.

probability = 0.2106

chi-squared with ties = 1.757 with 1 d.f.

probability = 0.1850

. kwallis accountability , by(countrydiv)

Kruskal-Wallis equality-of-populations rank test

| countrydiv | Obs | Rank Sum |
|------------|-----|----------|
| 0          | 27  | 810.50   |
| 1          | 39  | 1400.50  |

chi-squared = 1.503 with 1 d.f.

probability = 0.2202

chi-squared with ties = 1.774 with 1 d.f.

probability = 0.1829

## GEOGRAPHIC ANALYSIS of Survey Scores of Editors from ASIA VERSUS OTHER CONTINENTS

```
drop countrydiv
gen countrydiv =1
replace countrydiv = 0 if countrycode=="Asia"
(18 real changes made)
```

. kwallis conception, by(countrydiv)

Kruskal-Wallis equality-of-populations rank test

| country | Obs | Rank Sum |
|---------|-----|----------|
| 0       | 18  | 602.50   |
| 1       | 48  | 1608.50  |

chi-squared = 0.000 with 1 d.f.  
probability = 0.9948

chi-squared with ties = 0.000 with 1 d.f.  
probability = 0.9947

. kwallis design , by(countrydiv)

Kruskal-Wallis equality-of-populations rank test

| country | Obs | Rank Sum |
|---------|-----|----------|
| 0       | 18  | 526.50   |
| 1       | 48  | 1684.50  |

chi-squared = 1.213 with 1 d.f.  
probability = 0.2707

chi-squared with ties = 1.264 with 1 d.f.  
probability = 0.2609

. kwallis data\_acquisition, by(countrydiv)

Kruskal-Wallis equality-of-populations rank test

| country | Obs | Rank Sum |
|---------|-----|----------|
| 0       | 18  | 587.00   |
| 1       | 48  | 1624.00  |

chi-squared = 0.053 with 1 d.f.  
probability = 0.8178

chi-squared with ties = 0.055 with 1 d.f.  
probability = 0.8153

. kwallis data\_analysis , by(countrydiv)

Kruskal-Wallis equality-of-populations rank test

| country | Obs | Rank Sum |
|---------|-----|----------|
| 0       | 18  | 479.50   |
| 1       | 48  | 1731.50  |

chi-squared = 3.162 with 1 d.f.  
probability = 0.0754

chi-squared with ties = 3.271 with 1 d.f.  
probability = 0.0705

. kwallis interpret\_data , by(countrydiv)

Kruskal-Wallis equality-of-populations rank test

| country | Obs | Rank Sum |
|---------|-----|----------|
| 0       | 18  | 456.00   |
| 1       | 48  | 1755.00  |

chi-squared = 4.479 with 1 d.f.  
probability = 0.0343

chi-squared with ties = 4.669 with 1 d.f.  
probability = 0.0307

Given the extensive repeated multiple testing, with a Bonferroni correction the p value should be at most .05/9 = 0.0056 if not lower.

. kwallis draft , by(countrydiv)

Kruskal-Wallis equality-of-populations rank test

```
+-----+
| countr~v | Obs | Rank Sum |
+-----+
|          0 | 18 | 538.50 |
|          1 | 48 | 1672.50 |
+-----+
```

chi-squared = 0.862 with 1 d.f.  
probability = 0.3531

chi-squared with ties = 0.889 with 1 d.f.  
probability = 0.3457

. kwallis revision , by(countrydiv)

Kruskal-Wallis equality-of-populations rank test

```
+-----+
| countr~v | Obs | Rank Sum |
+-----+
|          0 | 18 | 570.00 |
|          1 | 48 | 1641.00 |
+-----+
```

chi-squared = 0.226 with 1 d.f.  
probability = 0.6347

chi-squared with ties = 0.237 with 1 d.f.  
probability = 0.6264

. kwallis final\_approval , by(countrydiv)

Kruskal-Wallis equality-of-populations rank test

```
+-----+
| countr~v | Obs | Rank Sum |
+-----+
|          0 | 18 | 642.00 |
|          1 | 48 | 1569.00 |
+-----+
```

chi-squared = 0.315 with 1 d.f.  
probability = 0.5744

chi-squared with ties = 0.353 with 1 d.f.  
probability = 0.5522

. kwallis accountability , by(countrydiv)

Kruskal-Wallis equality-of-populations rank test

```
+-----+
| countr~v | Obs | Rank Sum |
+-----+
|          0 | 18 | 581.00 |
|          1 | 48 | 1630.00 |
+-----+
```

chi-squared = 0.100 with 1 d.f.  
probability = 0.7514

chi-squared with ties = 0.118 with 1 d.f.  
probability = 0.7307

**GEOGRAPHIC ANALYSIS: OF SURVEY SCORES FROM EDITORS IN TRADITIONALLY ENGLISH-SPEAKING COUNTRIES VERSUS EDITORS FROM OTHER COUNTRIES**

```

drop countrydiv

. gen countrydiv = 0

. replace countrydiv = 1 if country=="United Kingdom"
(1 real change made)

. replace countrydiv = 1 if country=="North America"
(0 real changes made)

. replace countrydiv = 1 if countrycode=="NA"
(34 real changes made)

. replace countrydiv = 1 if countrycode=="Oceania"
(5 real changes made)

. replace countrydiv = 0 if country=="Mexico"
(1 real change made)

. replace countrydiv = 0 if country=="Cuba"
(1 real change made)

. kwallis conception, by(countrydiv)

```

Kruskal-Wallis equality-of-populations rank test

```

+-----+
| countr~v | Obs | Rank Sum |
+-----+-----+
|          0 | 28 | 965.00 |
|          1 | 38 | 1246.00 |
+-----+-----+

```

```

chi-squared = 0.123 with 1 d.f.
probability = 0.7261

```

```

chi-squared with ties = 0.126 with 1 d.f.
probability = 0.7231

```

```

. kwallis design , by(countrydiv)

```

Kruskal-Wallis equality-of-populations rank test

```

+-----+
| countr~v | Obs | Rank Sum |
+-----+-----+
|          0 | 28 | 922.00 |
|          1 | 38 | 1289.00 |
+-----+-----+

```

```

chi-squared = 0.043 with 1 d.f.
probability = 0.8355

```

```

chi-squared with ties = 0.045 with 1 d.f.
probability = 0.8322

```

```

. kwallis data_acquisition, by(countrydiv)

```

Kruskal-Wallis equality-of-populations rank test

```

+-----+
| countr~v | Obs | Rank Sum |
+-----+-----+
|          0 | 28 | 843.50 |
|          1 | 38 | 1367.50 |
+-----+-----+

```

```

chi-squared = 1.503 with 1 d.f.
probability = 0.2202

```

```

chi-squared with ties = 1.545 with 1 d.f.
probability = 0.2138

```

```

. kwallis data_analysis , by(countrydiv)

```

Kruskal-Wallis equality-of-populations rank test

```

+-----+

```



| country | Obs | Rank Sum |
|---------|-----|----------|
| 0       | 28  | 889.50   |
| 1       | 38  | 1321.50  |

chi-squared = 0.396 with 1 d.f.  
probability = 0.5292

chi-squared with ties = 0.410 with 1 d.f.  
probability = 0.5221

. kwallis interpret\_data , by(countrydiv)

Kruskal-Wallis equality-of-populations rank test

| country | Obs | Rank Sum |
|---------|-----|----------|
| 0       | 28  | 858.00   |
| 1       | 38  | 1353.00  |

chi-squared = 1.077 with 1 d.f.  
probability = 0.2993

chi-squared with ties = 1.123 with 1 d.f.  
probability = 0.2893

. kwallis draft , by(countrydiv)

Kruskal-Wallis equality-of-populations rank test

| country | Obs | Rank Sum |
|---------|-----|----------|
| 0       | 28  | 933.00   |
| 1       | 38  | 1278.00  |

chi-squared = 0.004 with 1 d.f.  
probability = 0.9483

chi-squared with ties = 0.004 with 1 d.f.  
probability = 0.9475

. kwallis revision , by(countrydiv)

Kruskal-Wallis equality-of-populations rank test

| country | Obs | Rank Sum |
|---------|-----|----------|
| 0       | 28  | 954.00   |
| 1       | 38  | 1257.00  |

chi-squared = 0.043 with 1 d.f.  
probability = 0.8355

chi-squared with ties = 0.045 with 1 d.f.  
probability = 0.8315

. kwallis final\_approval , by(countrydiv)

Kruskal-Wallis equality-of-populations rank test

| country | Obs | Rank Sum |
|---------|-----|----------|
| 0       | 28  | 1059.00  |
| 1       | 38  | 1152.00  |

chi-squared = 2.465 with 1 d.f.  
probability = 0.1164

chi-squared with ties = 2.762 with 1 d.f.  
probability = 0.0965

. kwallis accountability , by(countrydiv)

Kruskal-Wallis equality-of-populations rank test

```

+-----+
| countr~v | Obs | Rank Sum |
+-----+-----+
|          0 | 28 |    870.00 |
|          1 | 38 |   1341.00 |
+-----+

```

chi-squared = 0.778 with 1 d.f.  
probability = 0.3776

chi-squared with ties = 0.919 with 1 d.f.  
probability = 0.3378

### GENERALIZABILITY OF EDITOR RATINGS OF THE COMPONENTS OF AUTHORSHIP

#### WAME EDITORS (n=66) VERSUS OPHTHALMOLOGY[“E”ye] EDITORS (n=36)

#### Wilcoxon Signed Rank

|                               | EConception -<br>Conception | EDesign -<br>Design | EDataAQ -<br>Data_Acquisition | EDataAnal -<br>Data_Analysis | EIntepData -<br>Interpret_Data | EDraft -<br>Draft  | ERevision -<br>Revision | EFinal Approval -<br>Final_Approval | EAccountability -<br>Accountability |
|-------------------------------|-----------------------------|---------------------|-------------------------------|------------------------------|--------------------------------|--------------------|-------------------------|-------------------------------------|-------------------------------------|
| Z                             | -1.409 <sup>b</sup>         | -.770 <sup>b</sup>  | -.962 <sup>b</sup>            | -1.467 <sup>b</sup>          | -.462 <sup>b</sup>             | -.115 <sup>c</sup> | -.327 <sup>b</sup>      | -.332 <sup>c</sup>                  | -1.635 <sup>b</sup>                 |
| Asymp.<br>Sig. (2-<br>tailed) | 0.159                       | 0.441               | 0.336                         | 0.142                        | 0.644                          | 0.909              | 0.744                   | 0.740                               | 0.102                               |

a. Wilcoxon Signed Ranks Test

b. Based on negative ranks.

c. Based on positive ranks.

#### Authorship Component Ratings WAME Editors versus Ophthalmology (Eye) Editors

|                  | N  | Mean | Std.<br>Deviation | Minimum | Maximum | Percentiles |                  |      |
|------------------|----|------|-------------------|---------|---------|-------------|------------------|------|
|                  |    |      |                   |         |         | 25th        | 50th<br>(Median) | 75th |
| Conception       | 66 | 6.94 | 2.436             | 2       | 10      | 6.00        | 7.50             | 9.00 |
| EConception      | 36 | 7.53 | 2.396             | 1       | 10      | 6.00        | 8.00             | 9.00 |
| Design           | 66 | 7.00 | 2.327             | 2       | 10      | 6.00        | 8.00             | 9.00 |
| EDesign          | 36 | 7.39 | 2.018             | 1       | 10      | 6.00        | 8.00             | 9.00 |
| Data_Acquisition | 66 | 6.26 | 2.303             | 0       | 10      | 5.00        | 7.00             | 8.00 |
| Edata_ACQ        | 36 | 6.47 | 2.396             | 1       | 10      | 5.00        | 7.00             | 8.00 |

|                        |    |      |       |   |    |      |       |       |
|------------------------|----|------|-------|---|----|------|-------|-------|
| Data_Analysis          | 66 | 6.64 | 2.264 | 1 | 10 | 5.75 | 7.00  | 8.00  |
| <i>EDataAnal</i>       | 36 | 7.14 | 2.127 | 1 | 10 | 5.25 | 8.00  | 9.00  |
| Interpret_Data         | 66 | 7.58 | 2.008 | 1 | 10 | 7.00 | 8.00  | 9.00  |
| <i>EInteprData</i>     | 36 | 7.72 | 1.876 | 1 | 10 | 7.00 | 8.00  | 9.00  |
| Draft                  | 66 | 7.02 | 2.166 | 2 | 10 | 5.00 | 8.00  | 9.00  |
| <i>EDraft</i>          | 36 | 7.00 | 2.242 | 2 | 10 | 5.25 | 7.00  | 9.00  |
| Revision               | 66 | 7.82 | 1.913 | 2 | 10 | 6.00 | 8.00  | 9.00  |
| <i>ERevision</i>       | 36 | 8.03 | 2.091 | 2 | 10 | 7.00 | 9.00  | 9.00  |
| Final_Approval         | 66 | 8.09 | 2.498 | 1 | 10 | 6.75 | 9.00  | 10.00 |
| <i>EFinal Approval</i> | 36 | 7.92 | 2.951 | 1 | 10 | 7.25 | 9.00  | 10.00 |
| Accountability         | 66 | 8.38 | 2.352 | 1 | 10 | 7.00 | 10.00 | 10.00 |
| <i>EAccountability</i> | 36 | 8.81 | 2.175 | 1 | 10 | 8.00 | 10.00 | 10.00 |

## COMPARISON OF MEDIAN SURVEY SCORES OF THE WAME VERSUS OPHTHALMOLOGY EDITORS

```

signrank wame = ophtho
Wilcoxon signed-rank test
      sign |      obs   sum ranks   expected
-----+-----
      positive |         1         8         15
      negative |         3        22         15
      zero      |         5        15         15
-----+-----
      all      |         9        45         45
unadjusted variance      71.25
adjustment for ties      -0.50
adjustment for zeros     -13.75
-----
adjusted variance        57.00

Ho: wame = ophtho
      z = -0.927
      Prob > |z| = 0.3538

```
